# Supplementary material
Source: Springer Nature journal article supplement (https://www.springermedizin.de/resource/supplementary/12888_2014_1655_MOESM2_ESM.pdf/9481096)

**a**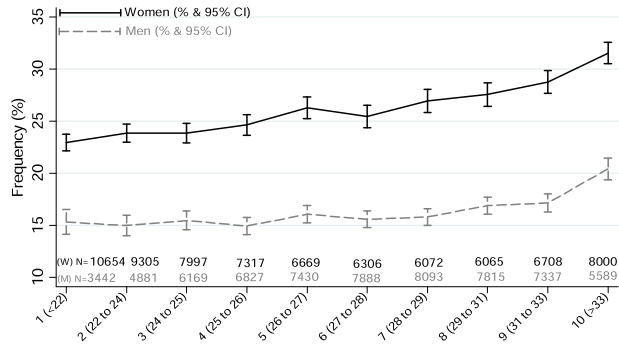**b**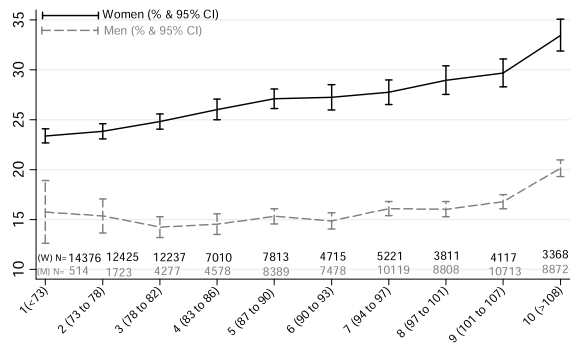**c**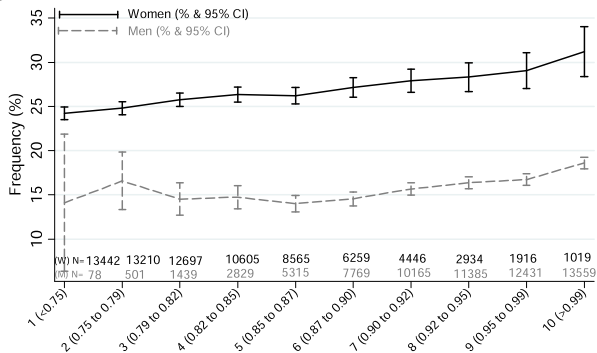**d**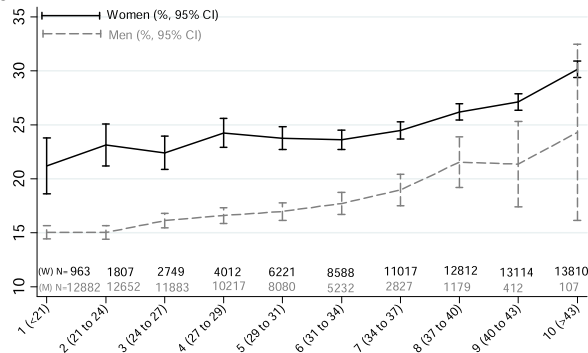

Supplement: MOESM2 [file 9481096]
